# Supplementary material for: Learning analytics for reducing student dropout in digital video platforms
Source: PeerJ journal article supplement (doi:10.7717/peerj-cs.3532), 2026-01-22
Supplement: Appendix_Digital_Dropout_Scale.docx [file Appendix_Digital_Dropout_Scale.docx]

**Digital Dropout Scale**

| **Dimensions/Statements** | | **Agree** | **Undecided** | **Disagree** |
| --- | --- | --- | --- | --- |
| **Satisfaction** | | | | |
| 1 | I feel frustrated when I use DVPs in learning. |  |  |  |
| 2 | I can easily use DVPs. |  |  |  |
| 3 | I hope to take more lessons using DVPs. |  |  |  |
| 4 | I am satisfied with what I have learnt through DVPs. |  |  |  |
| 5 | I enjoy learning using DVPs. |  |  |  |
| 6 | I feel comfortable when I use DVPs. |  |  |  |
| 7 | I appreciate the value of learning through DVPs. |  |  |  |
| 8 | I feel I have an incentive when I use DVPs. |  |  |  |
| 9 | I avoid using DVPs in learning. |  |  |  |
| 10 | I think that displaying the content on DVPs suits my strategy of learning. |  |  |  |
| **Engagement** | | | | |
| 11 | I think that DVPs facilitated my learning with other students. |  |  |  |
| 12 | I face difficulty being engaged away from the traditional class. |  |  |  |
| 13 | I can interact with my teacher and classmates on DVPs. |  |  |  |
| 14 | I initiate discussions with classmates when I use DVPs. |  |  |  |
| 15 | I can make connections and friendships through DVPs. |  |  |  |
| 16 | I feel I am strange when I use DVPs. |  |  |  |
| 17 | I like doing group assignments using DVPs. |  |  |  |
| 18 | I think that using DVPs contributed to increasing my participation. |  |  |  |
| 19 | I get instant feedback when I use DVPs. |  |  |  |
| 20 | I regularly participate in all discussion tools available on DVPs. |  |  |  |
| **Continuity** | | | | |
| 21 | I completed watching all video clips on DVPs. |  |  |  |
| 22 | I find it difficult to watch the video clips on DVPs. |  |  |  |
| 23 | I continue accomplishing educational tasks regardless their difficulty when I use DVPs. |  |  |  |
| 24 | I spend a lot of time learning on DVPs. |  |  |  |
| 25 | I feel I have strong determination to accomplish the educational tasks when I use DVPs. |  |  |  |
| 26 | I feel the time is flexible to finish the educational tasks. |  |  |  |
| 27 | I avoid studying on DVPs because of my limited capabilities. |  |  |  |
| 28 | I feel that using DVPs supports the educational content. |  |  |  |
| 29 | I think that using DVPs motivates me to get engaged in learning. |  |  |  |
| 30 | I am willing to continue learning using DVPs. |  |  |  |
