# Supplementary material for: Learning analytics for reducing student dropout in digital video platforms
Source: PeerJ journal article supplement (doi:10.7717/peerj-cs.3532), 2026-01-22
Supplement: Raw_Data.xlsx [file Raw_Data.xlsx]

## Sheet: Dropout
	student NO	Satisfaction			Participation			Continuity												Overall score Dropout
		G1- DVP with LA	G2- DVP without LA		G1- DVP with LA	G2- DVP without LA		G1- DVP with LA	G2- DVP without LA											G1- DVP with LA	G2- DVP without LA
	1	25	18		30	16		25	18											80	52
	2	25	17		26	16		26	19											77	52
	3	28	17		29	18		27	19											84	54
	4	28	18		27	17		26	19											81	54
	5	27	18		26	19		28	19											81	56
	6	28	19		29	21		26	19											83	59
	7	28	20		25	15		30	19											83	54
	8	28	18		30	21		30	17											88	56
	9	29	16		25	18		29	18											83	52
	10	22	16		30	16		26	18											78	50
	11	27	17		30	17		29	16											86	50
	12	28	17		26	17		29	20											83	54
	13	29	16		27	16		30	18											86	50
	14	24	20		23	17		29	18											76	55
	15	28	19		23	16		28	16											79	51
	16	28	19		23	17		28	17											79	53
	17	27	23		30	18		27	19											84	60
	18	29	19		27	18		29	19											85	56
	19	24	21		27	20		26	19											77	60
	20	29	22		28	19		29	16											86	57
	21	25	22		23	19		29	19											77	60
	22	28	20		23	17		29	17											80	54
	23	25	18		26	19		29	19											80	56
	24	25	20		24	21		30	18											79	59
	25	24	20		30	19		29	16											83	55
	26	28	21		25	18		28	17											81	56
	27	29	19		26	15		29	22											84	56
	28	29	22		29	16		27	19											85	57
	29	30	21		28	18		29	19											87	58
	30	30	19		29	16		27	17											86	52
		27.1333	19.0667		26.8	17.6667		28.1	18.2								#DIV/0!	#DIV/0!		82.0333	54.9333
